# Supplementary material for: High intrinsic thermal conductivity in cellulose nanocrystal films through pitch regulation
Source: Royal Society of Chemistry journal article supplement (doi:10.1039/d1ta07946h), 2021-01-01
Supplement: d1ta07946h1.pdf [file d1ta07946h1.pdf]

## Supporting Information

### **Highly intrinsic thermal conductivity of cellulose nanocrystals films through pitch regulation**

Jianguo Zhang,<sup>a</sup> Tianxing Chen,<sup>a</sup> Siyuan Liu,<sup>a</sup> Zhixin Chen,<sup>b</sup> Yao Li,<sup>a</sup> Shenmin Zhu,<sup>\*a</sup> and Hua

Li<sup>\*a</sup> <sup>a</sup> State Key Laboratory of Metal Matrix Composites, Shanghai Jiao Tong University,  
Shanghai 200240, China.

<sup>b</sup> School of Mechanical, Materials & Mechatronics Engineering, University of Wollongong,  
Wollongong, NSW 2522, Australia.

\* Corresponding author. E-mail: [smzhu@sjtu.edu.cn](mailto:smzhu@sjtu.edu.cn)

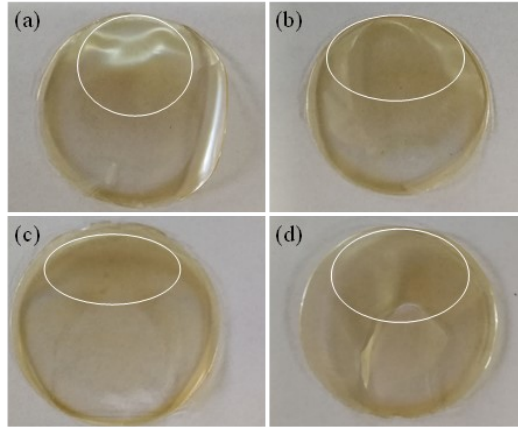

**Fig. S1** Optical images of (a) CNCs-  $\text{Fe}_3\text{O}_4/\text{CNC}$ -1.10-H11-90 film, (b) CNCs-  $\text{Fe}_3\text{O}_4/\text{CNC}$ -1.10-H23-90 film, (c) CNCs-  $\text{Fe}_3\text{O}_4/\text{CNC}$ -1.10-H11-45 film, (d) CNCs-  $\text{Fe}_3\text{O}_4/\text{CNC}$ -1.10-H23-45 film.

90 and 45 represent the angle of the vertical magnetic field tilt.  $\text{Fe}_3\text{O}_4/\text{CNC}$  agglomeration appeared in all films. The white circles circled the reunion areas.

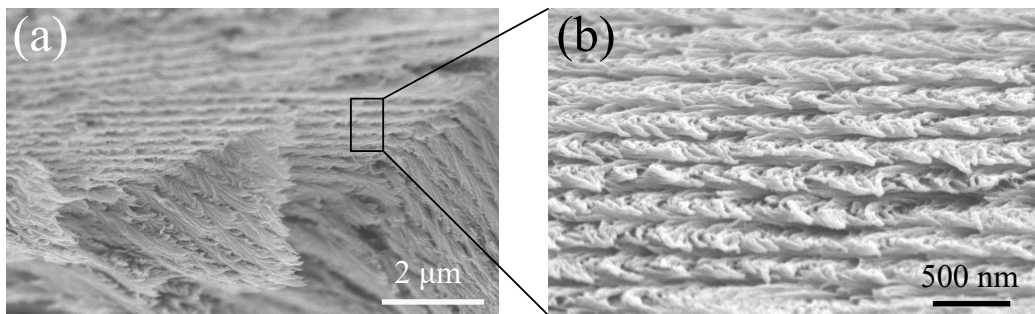

**Fig. S2** SEM images of oblique section of the  $\text{CNC-Fe}_3\text{O}_4/\text{CNC}$  film, (a) and (b).in different magnifications.

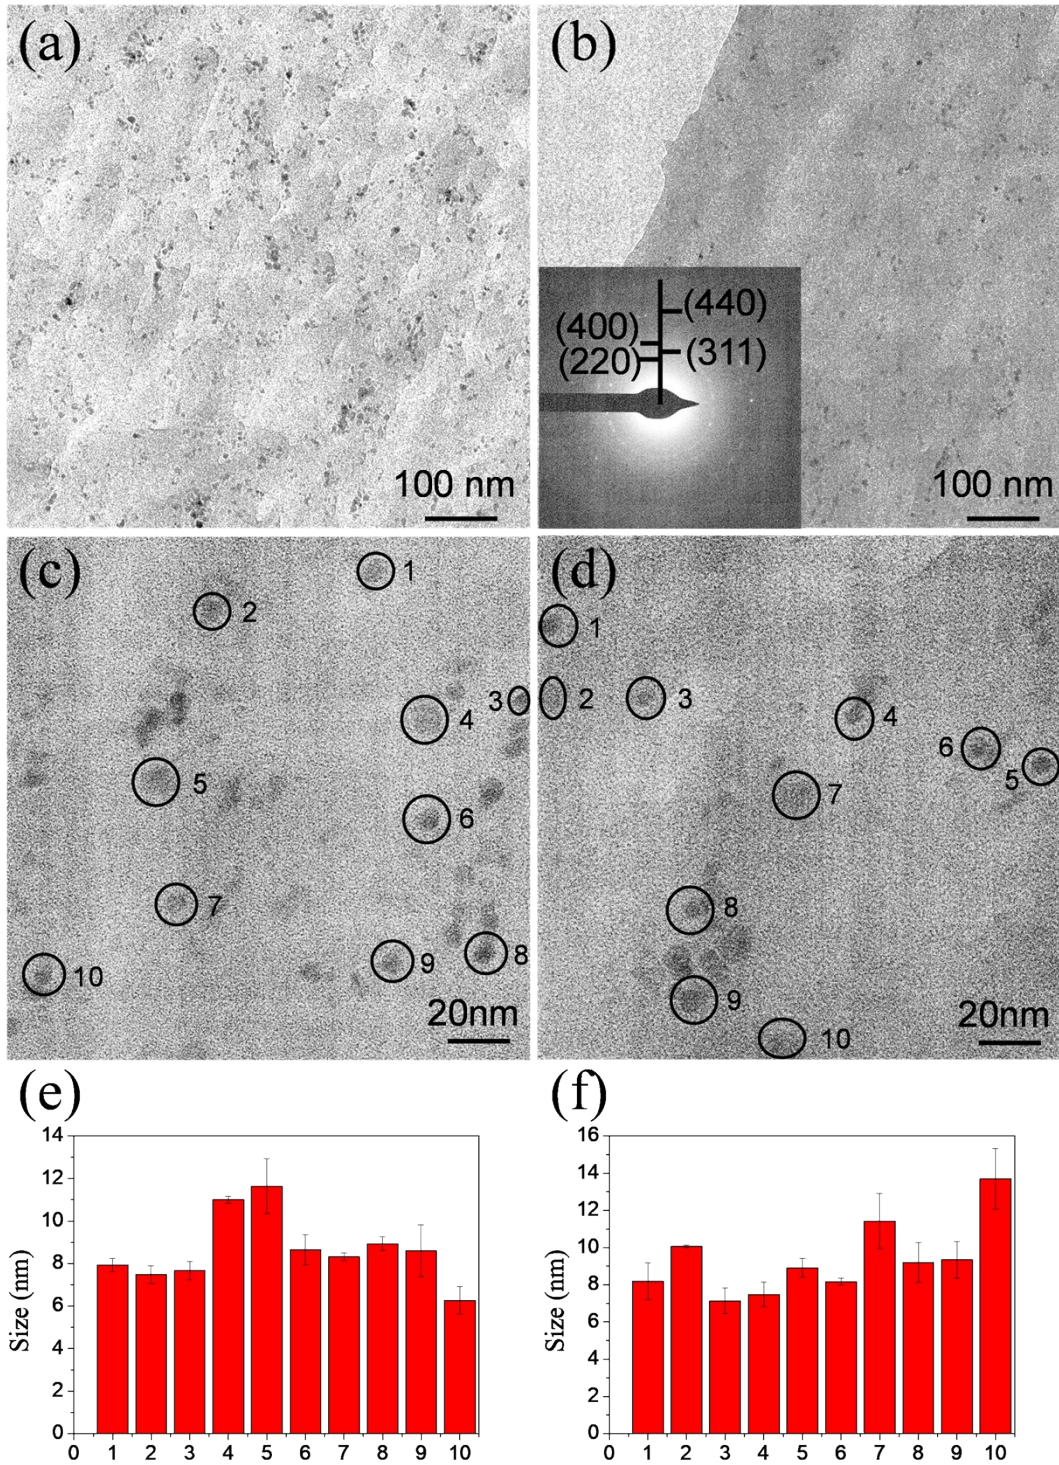

**Fig. S3** The cross-section TEM images of CNC-Fe<sub>3</sub>O<sub>4</sub>/CNC-1.10 film (a, c, d), the selected area electron diffraction (SAED) pattern of one Fe<sub>3</sub>O<sub>4</sub> particle shown in (b), measurement results of the Fe<sub>3</sub>O<sub>4</sub> particle size from Fig. S3c image (e), measurement results of the Fe<sub>3</sub>O<sub>4</sub> particle size from Fig. S3d image (f).

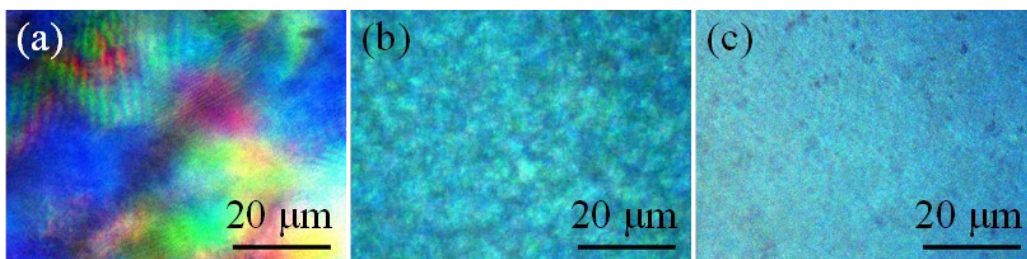

**Fig. S4** POM images of (a) CNCs film, (b) CNC-Fe<sub>3</sub>O<sub>4</sub>/CNC-1.90 film, (c) CNC-Fe<sub>3</sub>O<sub>4</sub>/CNC-2.84 film.

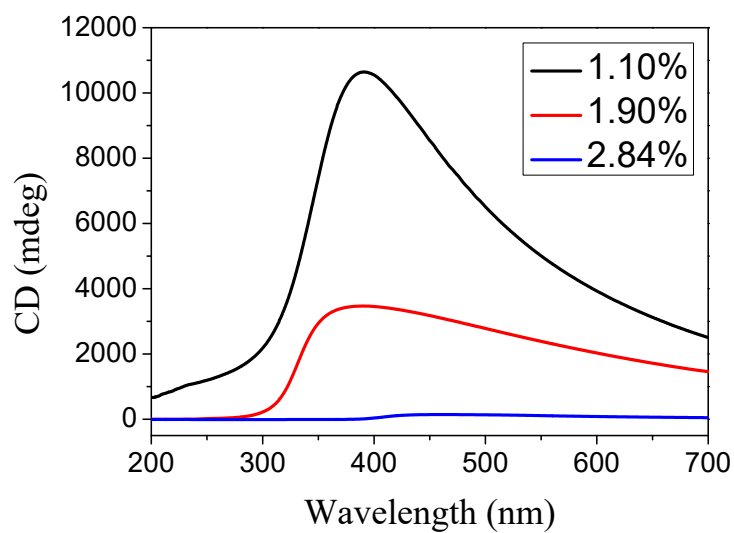

**Fig. S5** Circular dichroism spectra for CNC-Fe<sub>3</sub>O<sub>4</sub>/CNC-1.10 film, CNC-Fe<sub>3</sub>O<sub>4</sub>/CNC-1.90 film, and CNC-Fe<sub>3</sub>O<sub>4</sub>/CNC-2.84 film.

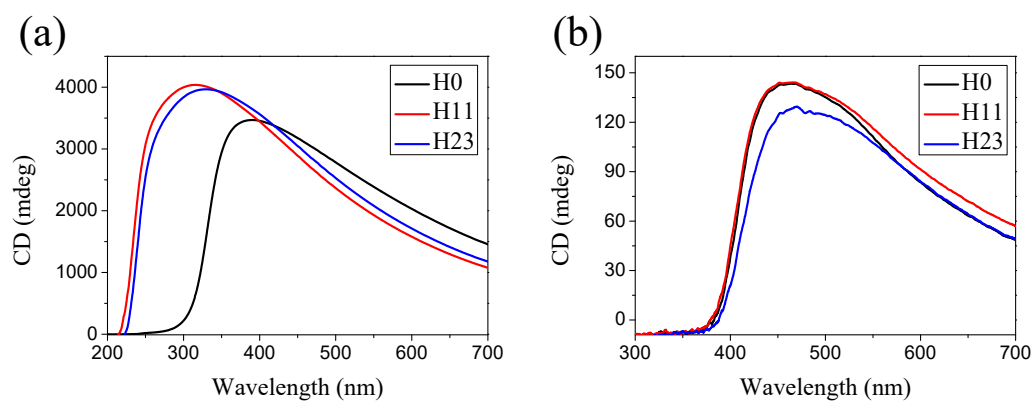

**Fig. S6** Circular dichroism spectra of (a) CNC-Fe<sub>3</sub>O<sub>4</sub>/CNC-1.90 films, (b) CNC-Fe<sub>3</sub>O<sub>4</sub>/CNC-2.84 films formed under different magnetic field intensities.

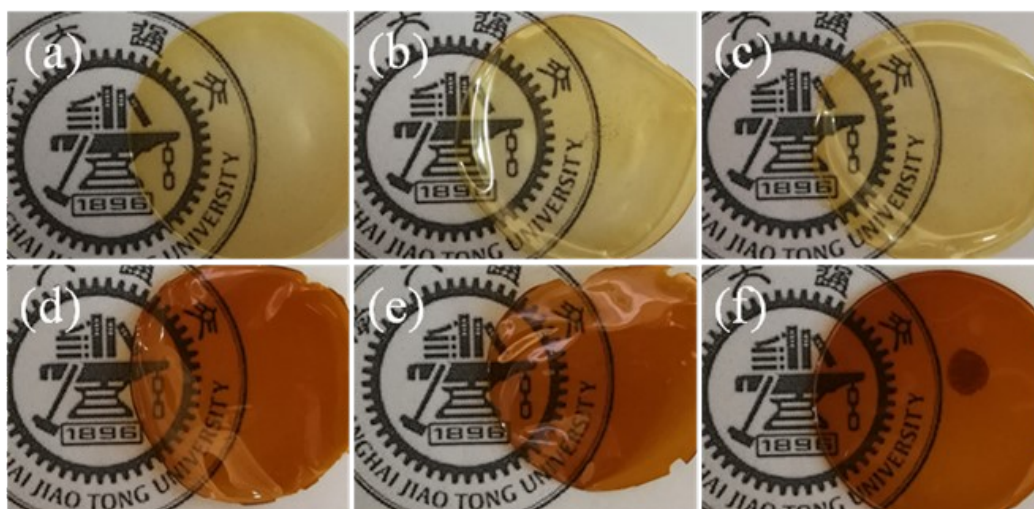

**Fig. S7** Optical images of (a) CNC-Fe<sub>3</sub>O<sub>4</sub>/CNC-1.90-H0 film, (b) CNC-Fe<sub>3</sub>O<sub>4</sub>/CNC-1.90-H11 film, (c) CNC-Fe<sub>3</sub>O<sub>4</sub>/CNC-1.90-H23 film, (d) CNC-Fe<sub>3</sub>O<sub>4</sub>/CNC-2.84-H0 film, (e) CNC-Fe<sub>3</sub>O<sub>4</sub>/CNC-2.84-H11 film, (f) CNC-Fe<sub>3</sub>O<sub>4</sub>/CNC-2.84-H23 film.

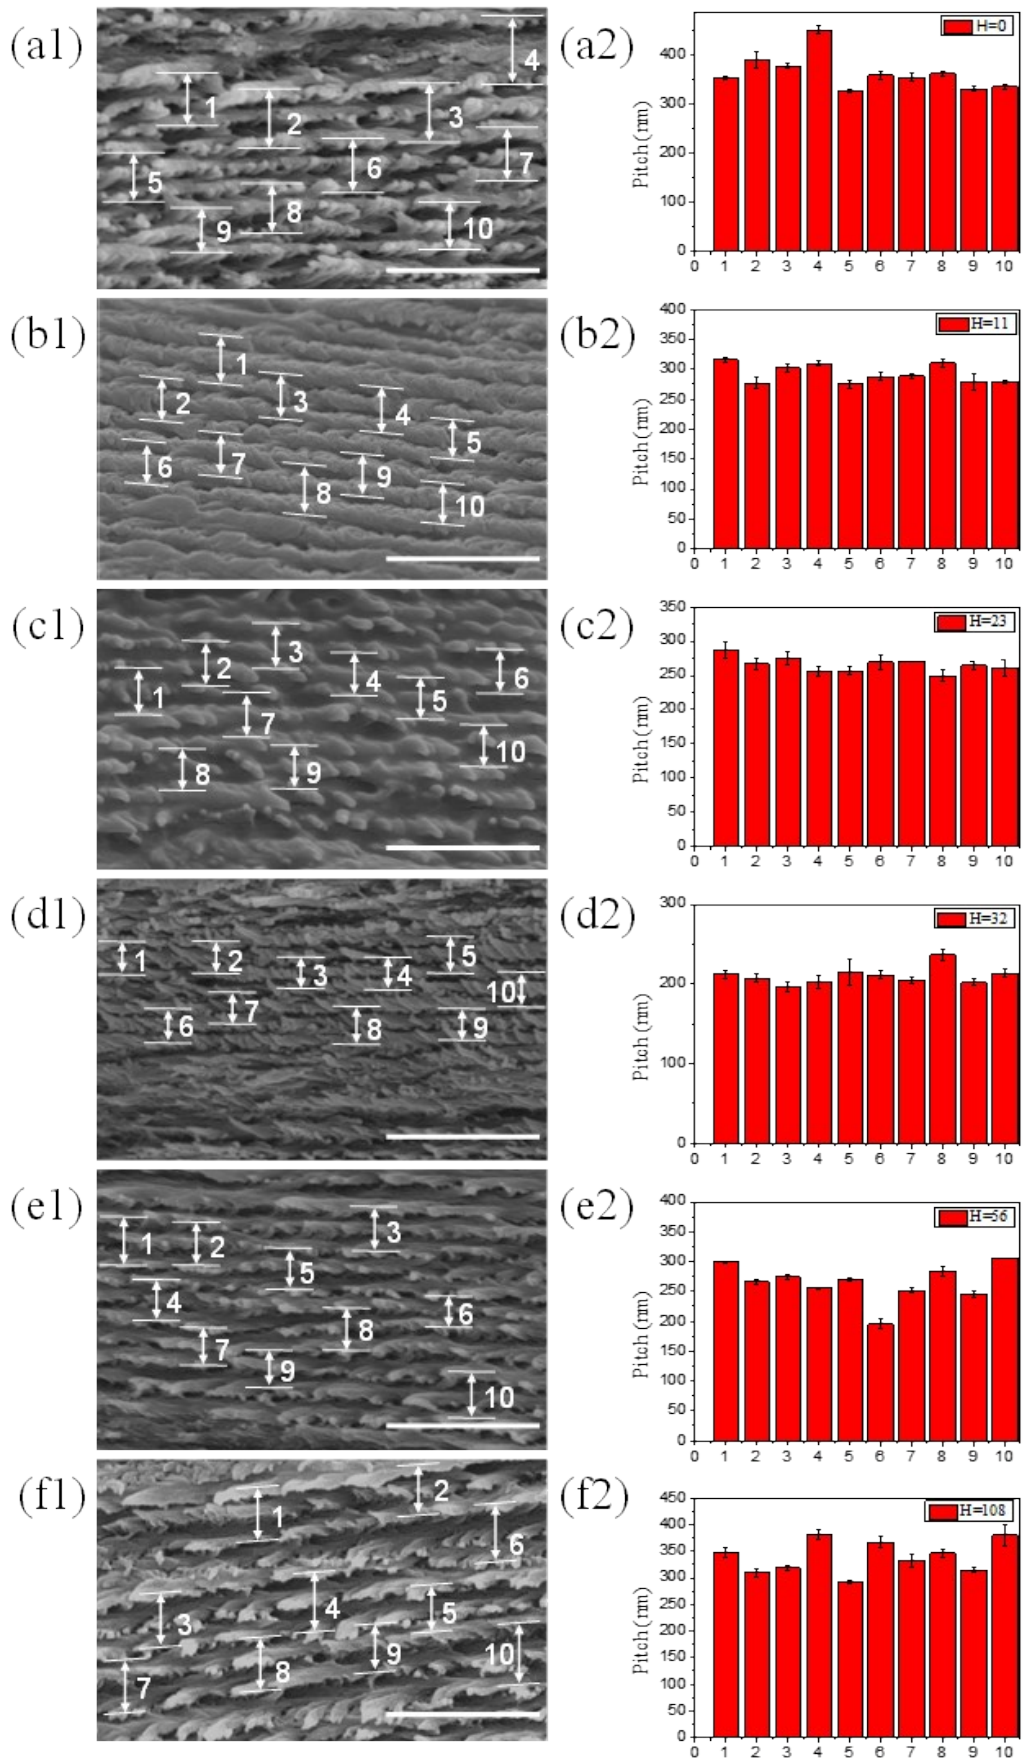

**Fig. S8** SEM images of cross-sections of the CNC-Fe<sub>3</sub>O<sub>4</sub>/CNC-1.10 films formed under different magnetic field intensities and the pitch sizes measured from the images. The scale bar is 1 μm. (a1) and (a2) 0 mT, (b1) and (b2) 11 mT, (c1) and (c2) 23 mT, (d1) and (d2) 32mT, (e1) and (e2) 56 mT, (f1) and (f2) 108 mT.

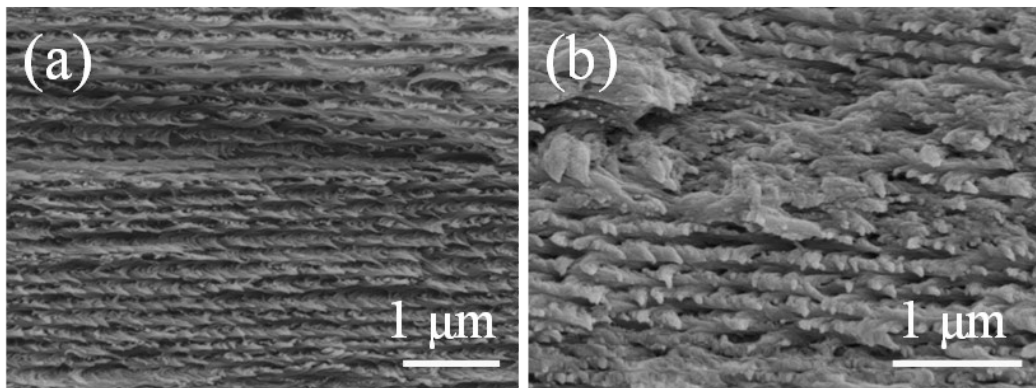

**Fig. S9** SEM images of cross-sections of the CNC-Fe<sub>3</sub>O<sub>4</sub>/CNC-1.10 films formed under magnetic field intensity of (a) 32 mT, (b) 108 mT.

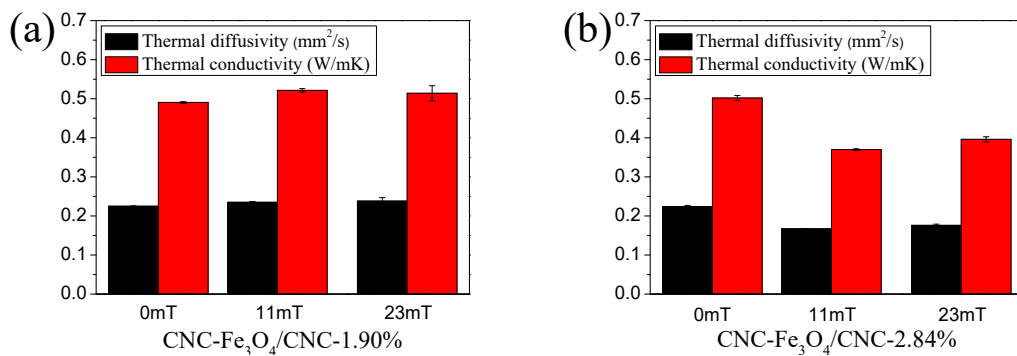

**Fig. S10** The out-plane thermal diffusivities (TD) and thermal conductivities (TC) of (a) CNC-Fe<sub>3</sub>O<sub>4</sub>/CNC-1.90 films, (b) CNC-Fe<sub>3</sub>O<sub>4</sub>/CNC-2.84 films under different magnetic field intensities.

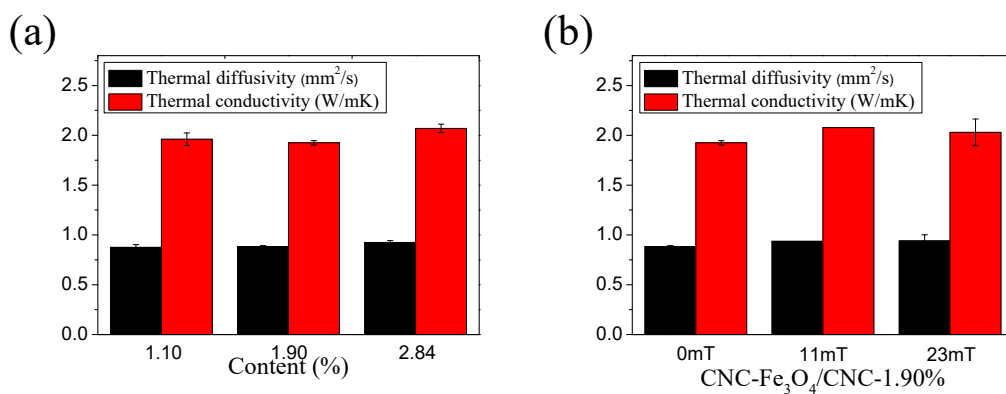

**Fig. S11** The in-plane thermal diffusivities (TD) and thermal conductivities (TC) of (a) films with different contents of Fe<sub>3</sub>O<sub>4</sub>, (b) CNC-Fe<sub>3</sub>O<sub>4</sub>/CNC-1.90 films formed under different magnetic field intensities.

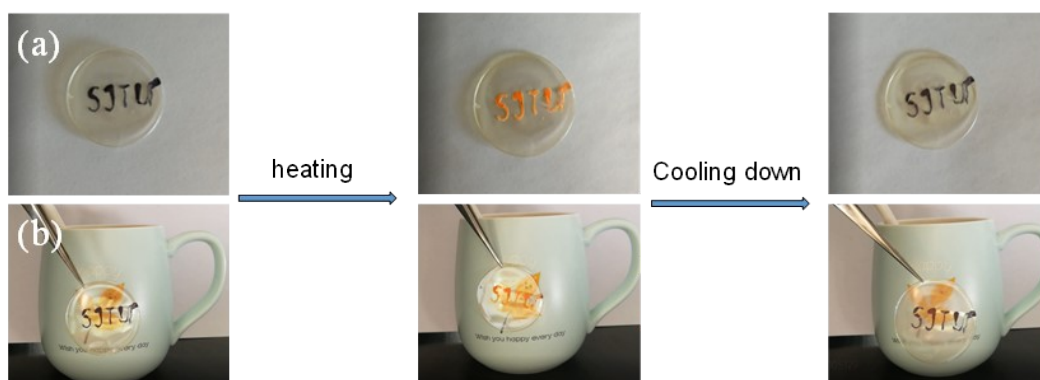

**Fig. S12** The transparent CNC-Fe<sub>3</sub>O<sub>4</sub>/CNC-1.10-H32 film as thermochromic membrane.

The crystallinity ( $X_C$ ) of CNCs can be calculated by Segal's method:



$$X_C = ((I_{002} - I_{am}) / I_{002}) \times 100$$

where  $I_{am}$  is the diffraction intensity of the amorphous phase taken at angle around  $18^\circ - 19^\circ$ .  $I_{002}$  is the intensity of the (0 0 2) peak, which is the maximum intensity in XRD. From the XRD pattern in Fig. 2b, the crystallinities of the CNCs prepared by us and CNCs in  $\text{Fe}_3\text{O}_4/\text{CNC}$  are calculated as:

**Table S1** The crystallinities of CNCs and CNCs in  $\text{Fe}_3\text{O}_4/\text{CNC}$

| Sample                                     | $I_{002}$ | $I_{am}$ | $X_C$  |
|--------------------------------------------|-----------|----------|--------|
| CNCs                                       | 1778      | 218      | 87.7 % |
| CNCs in $\text{Fe}_3\text{O}_4/\text{CNC}$ | 373       | 45       | 87.9 % |

**Table S2** Through-plane thermal conductivities

| Sample                                            | Thermal diffusivity<br>(mm <sup>2</sup> s <sup>-1</sup> ) | Density<br>(g cm <sup>-3</sup> ) | specific heat capacity<br>(J g <sup>-1</sup> k <sup>-1</sup> ) | Thermal conductivity<br>(Wm <sup>-1</sup> K <sup>-1</sup> ) |
|---------------------------------------------------|-----------------------------------------------------------|----------------------------------|----------------------------------------------------------------|-------------------------------------------------------------|
| CNCs                                              | 0.197±0.002                                               | 1.479                            | 1.539                                                          | 0.448±0.005                                                 |
| CNC-Fe <sub>3</sub> O <sub>4</sub> /CNC-1.10-H0   | 0.211±0.003                                               | 1.504                            | 1.490                                                          | 0.473±0.007                                                 |
| CNC-Fe <sub>3</sub> O <sub>4</sub> /CNC-1.10-H11  | 0.237±0.005                                               | 1.523                            |                                                                | 0.538±0.011                                                 |
| CNC-Fe <sub>3</sub> O <sub>4</sub> /CNC-1.10-H23  | 0.263±0.003                                               | 1.532                            |                                                                | 0.600±0.007                                                 |
| CNC-Fe <sub>3</sub> O <sub>4</sub> /CNC-1.10-H32  | 0.351±0.003                                               | 1.525                            |                                                                | 0.798±0.007                                                 |
| CNC-Fe <sub>3</sub> O <sub>4</sub> /CNC-1.10-H56  | 0.349±0.003                                               | 1.518                            |                                                                | 0.790±0.007                                                 |
| CNC-Fe <sub>3</sub> O <sub>4</sub> /CNC-1.10-H108 | 0.309±0.005                                               | 1.518                            |                                                                | 0.699±0.011                                                 |
| CNC-Fe <sub>3</sub> O <sub>4</sub> /CNC-1.90-H0   | 0.225±0.001                                               | 1.496                            | 1.457                                                          | 0.490±0.002                                                 |
| CNC-Fe <sub>3</sub> O <sub>4</sub> /CNC-1.90-H11  | 0.235±0.002                                               | 1.523                            |                                                                | 0.521±0.004                                                 |
| CNC-Fe <sub>3</sub> O <sub>4</sub> /CNC-1.90-H23  | 0.238±0.009                                               | 1.482                            |                                                                | 0.514±0.019                                                 |
| CNC-Fe <sub>3</sub> O <sub>4</sub> /CNC-2.84-H0   | 0.224±0.003                                               | 1.518                            | 1.475                                                          | 0.502±0.007                                                 |
| CNC-Fe <sub>3</sub> O <sub>4</sub> /CNC-2.84-H11  | 0.167±0.001                                               | 1.501                            |                                                                | 0.370±0.002                                                 |
| CNC-Fe <sub>3</sub> O <sub>4</sub> /CNC-2.84-H23  | 0.176±0.003                                               | 1.525                            |                                                                | 0.396±0.007                                                 |

**Table S3** In-plane thermal conductivities

| Sample                                           | Thermal diffusivity<br>(mm <sup>2</sup> s <sup>-1</sup> ) | Density<br>(g cm <sup>-3</sup> ) | specific heat capacity<br>(J g <sup>-1</sup> k <sup>-1</sup> ) | Thermal conductivity<br>(Wm <sup>-1</sup> K <sup>-1</sup> ) |
|--------------------------------------------------|-----------------------------------------------------------|----------------------------------|----------------------------------------------------------------|-------------------------------------------------------------|
| CNC-Fe <sub>3</sub> O <sub>4</sub> /CNC-1.10-H0  | 0.875±0.028                                               | 1.504                            | 1.490                                                          | 1.961±0.063                                                 |
| CNC-Fe <sub>3</sub> O <sub>4</sub> /CNC-1.90-H0  | 0.883±0.01                                                | 1.496                            | 1.457                                                          | 1.925±0.022                                                 |
| CNC-Fe <sub>3</sub> O <sub>4</sub> /CNC-1.90-H11 | 0.936±0.00                                                | 1.523                            |                                                                | 2.077±0.00                                                  |
| CNC-Fe <sub>3</sub> O <sub>4</sub> /CNC-1.90-H23 | 0.94±0.062                                                | 1.482                            |                                                                | 2.030±0.134                                                 |
| CNC-Fe <sub>3</sub> O <sub>4</sub> /CNC-2.84-H0  | 0.924±0.019                                               | 1.518                            | 1.475                                                          | 2.069±0.043                                                 |
